# Supplementary material
Source: bioRxiv or medRxiv preprint supplement (https://www.biorxiv.org/highwire/filestream/34752/field_highwire_adjunct_files/0/118836-1.pdf)
Supplement: Supplementary file [file 118836-1.pdf]

Supplementary Table 1. Sample details

| Sample     | Location                              | Population           | Hpall | Mspl | AFLP |
|------------|---------------------------------------|----------------------|-------|------|------|
| ABTC55653  | Hareby Island, South Australia        | Hareby_Island        | Y     | Y    |      |
| ABTC55694  | Coomalbidgup, Western Australia       | WA                   | Y     | Y    |      |
| ABTC55760  | Reevesby Island, South Australia      | Reevesby_Island      | Y     | Y    | Y    |
| ABTC35082  | Salt Creek, South Australia           | SE_SA                | Y     | Y    | Y    |
| ABTC55669  | Lake Alexandrina, South Australia     | SE_SA                | Y     | Y    | Y    |
| ABTC55695  | Armidale, New South Wales             | NSW                  | Y     | Y    | Y    |
| ABTC13146  | Melbourne, Victoria                   | Melbourne            | Y     | Y    | Y    |
| ABTC55780  | St Peter Island, South Australia      | St_Peter_Island      | Y     | Y    | Y    |
| ABTC55739  | Franklin Island East, South Australia | Franklin_Island_East | Y     | Y    | Y    |
| ABTC55657  | Roxby Island, South Australia         | Roxby_Island         | Y     | Y    | Y    |
| ABTC55703  | Kangaroo Island, South Australia      | Kangaroo_Island      | Y     | Y    | Y    |
| ABTC55763  | Hareby Island, South Australia        | Hareby_Island        | Y     | Y    |      |
| ABTC37434  | Donovans, South Australia             | SE_SA                | Y     | Y    | Y    |
| ABTC55670  | Kangaroo Island, South Australia      | Kangaroo_Island      | Y     | Y    | Y    |
| ABTC56203  | Kangaroo Island, South Australia      | Kangaroo_Island      | Y     | Y    | Y    |
| ABTC13329  | Franklin Island West, South Australia | Franklin_Island_West | Y     | Y    | Y    |
| ABTC56009  | Lake Coolelal, Western Australia      | WA                   | Y     | Y    | Y    |
| ABTC55765  | Hareby Island, South Australia        | Hareby_Island        | Y     | Y    | Y    |
| ABTC55662  | Roxby Island, South Australia         | Roxby_Island         | Y     | Y    | Y    |
| ABTC55704  | Franklin Island West, South Australia | Franklin_Island_West | Y     | Y    | Y    |
| ABTC55779  | St Peter Island, South Australia      | St_Peter_Island      | Y     | Y    | Y    |
| ABTC37619  | The Gap, South Australia              | SE_SA                | Y     | Y    | Y    |
| ABTC55677  | Goat Island, South Australia          | Goat_Island          | Y     | Y    | Y    |
| ABTC57961  | Adelaide, South Australia             | Adelaide             | Y     | Y    | Y    |
| ABTC23229  | Lake Dove, Cradle Mt NP, Tasmania     | TAS                  | Y     | Y    | Y    |
| ABTC32106  | Tallebudgera Valley, Queensland       | NSW                  | Y     | Y    | Y    |
| ABTC55766  | Grindal Island, South Australia       | Grindal_Island       | Y     | Y    | Y    |
| ABTC55676  | Goat Island, South Australia          | Goat_Island          | Y     | Y    | Y    |
| ABTC55725  | Hareby Island, South Australia        | Hareby_Island        | Y     | Y    | Y    |
| ABTC55781  | Goat Island, South Australia          | Goat_Island          | Y     | Y    | Y    |
| ABTC37724  | Rendelsham, South Australia           | SE_SA                | Y     | Y    | Y    |
| ABTC55679  | Ewe Island, South Australlia          | SE_SA                | Y     | Y    | Y    |
| ABTC76797  | Reevesby Island, South Australia      | Reevesby_Island      | Y     | Y    | Y    |
| ABTC23398  | Mt Eliza, Tasmania                    | TAS                  | Y     | Y    |      |
| ABTC33214  | Dunmore HS, South Australia           | SE_SA                | Y     | Y    | Y    |
| ANWCR06859 | Nowra, New South Wales                | NSW                  | Y     | Y    |      |
| ABTC55945  | Franklin Island East, South Australia | Franklin_Island_East | Y     | Y    |      |
| ABTC55735  | Kangaroo Island, South Australia      | Kangaroo_Island      | Y     | Y    | Y    |
| ABTC56169  | Chappell Island, Tasmania             | Chappell_Island      | Y     | Y    | Y    |
| ABTC55994  | St Francis Island, South Australia    | St_Francis_Island    | Y     | Y    | Y    |
| ABTC55687  | Lort River, Western Australia         | WA                   | Y     | Y    | Y    |
| ABTC95526  | Murray Mouth, South Australia         | SE_SA                | Y     | Y    | Y    |
| ABTC55711  | Little Dip CP, South Australia        | SE_SA                | Y     | Y    | Y    |
| ABTC55797  | Franklin Island West, South Australia | Franklin_Island_West | Y     | Y    | Y    |
| ABTC55959  | Franklin Island East, South Australia | Franklin_Island_East | Y     | Y    | Y    |
| ABTC55750  | Williams Island, South Australia      | Williams_Island      | Y     | Y    | Y    |
| ABTC56039  | Chappell Island, Tasmania             | Chappell_Island      | Y     | Y    | Y    |
| ABTC55656  | Naracoorte CP, South Australia        | SE_SA                | Y     | Y    | Y    |
| ABTC55689  | Coomalbidgup, Western Australia       | WA                   | Y     | Y    | Y    |

|           |                                       |                      |   |   |   |
|-----------|---------------------------------------|----------------------|---|---|---|
| ABTC93468 | Adelaide, South Australia             | Adelaide             | Y | Y | Y |
| ABTC55768 | Kangaroo Island, South Australia      | Kangaroo_Island      | Y | Y | Y |
| ABTC55712 | Kangaroo Island, South Australia      | Kangaroo_Island      | Y | Y |   |
| TS313     | South East, South Australia           | SE_SA                | Y | Y | Y |
| ABTC55797 | Franklin Island West, South Australia | Franklin_Island_West | Y | Y | Y |
| ABTC55756 | Reevesby Island, South Australia      | Reevesby_Island      | Y | Y | Y |
| ABTC56202 | Kangaroo Island, South Australia      | Kangaroo_Island      | Y | Y | Y |
| ABTC55659 | Roxby Island, South Australia         | Roxby_Island         | Y | Y | Y |
| ABTC55690 | Dalyup, Western Australia             | WA                   | Y | Y | Y |
| ABTC93453 | Adelaide, South Australia             | Adelaide             | Y | Y | Y |
| ABTC55776 | Franklin Island West, South Australia | Franklin_Island_West | Y | Y |   |
| ABTC55715 | Reevesby Island, South Australia      | Reevesby_Island      | Y | Y | Y |
| TS352     | Melbourne, Victoria                   | Melbourne            | Y | Y | Y |
| ABTC55693 | Coomalbidgup, Western Australia       | WA                   | Y | Y |   |
| ABTC55758 | Reevesby Island, South Australia      | Reevesby_Island      | Y | Y |   |
| ABTC56221 | Kangaroo Island, South Australia      | Kangaroo_Island      | Y | Y | Y |
| ABTC55664 | Lake Alexandrina, South Australia     | SE_SA                | Y | Y | Y |
| ABTC55692 | Coomalbidgup, Western Australia       | WA                   | Y | Y | Y |
| ABTC13134 | Melbourne, Victoria                   | Melbourne            | Y | Y |   |
| ABTC55778 | Adelaide, South Australia             | Adelaide             | Y | Y | Y |
| ABTC55720 | Adelaide, South Australia             | Adelaide             | Y | Y | Y |

ABTC – Australian Biological Tissue Collection, South Australian Museum; ANWC – Australian National Wildlife Collection, CSIRO.
